# Supplementary material
Source: publisher figshare collection journal article supplement (https://acs.figshare.com/ndownloader/files/4704754)
Supplement: Supplementary file 1 [file 4704754]

## Supporting Information

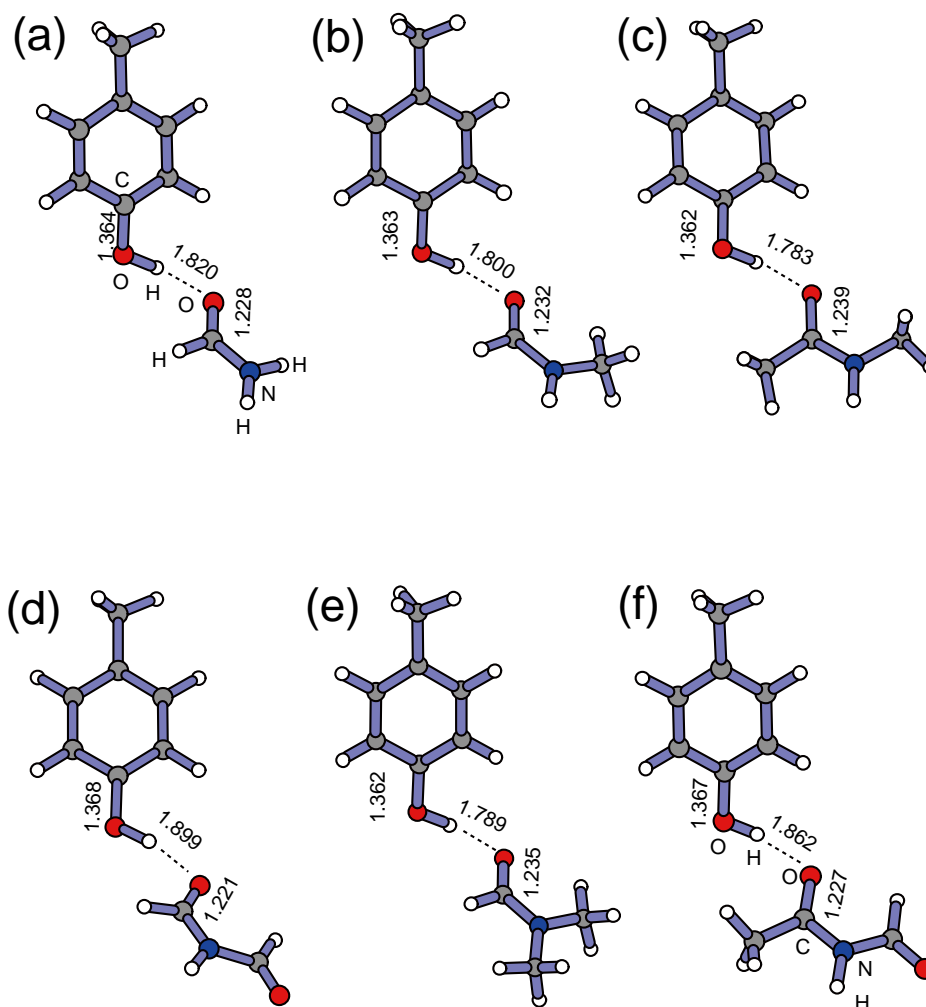

FIGURE S1: Optimized structures of the model complexes of *p*-cresol that acts as a hydrogen-bond donor to the C=O of formamide (a), *N*-methylformamide (b), *N*-methylacetamide (c), diformamide (d), *N,N*-dimethylformamide (e), *N*-formylacetamide (f).
